# Supplementary material for: Cell-Main Spectra Profile Screening Technique in Simulation of Circulating Tumour Cells Using MALDI-TOF Mass Spectrometry
Source: MDPI journal article supplement (doi:10.3390/cancers13153775), 2021-07-27
Supplement: s1 [file s1]

# Cell-Main Spectra Profile Screening Technique in Simulation of Circulating Tumour Cells Using MALDI-TOF Mass Spectrometry

Wararat Chiangjong, Sebastian Chakrit Bhakdi, Noppawan Woramongkolchai, Thitinee Vanichapol, Nutkridta Pongsakul, Suradej Hongeng and Somchai Chutipongtanate

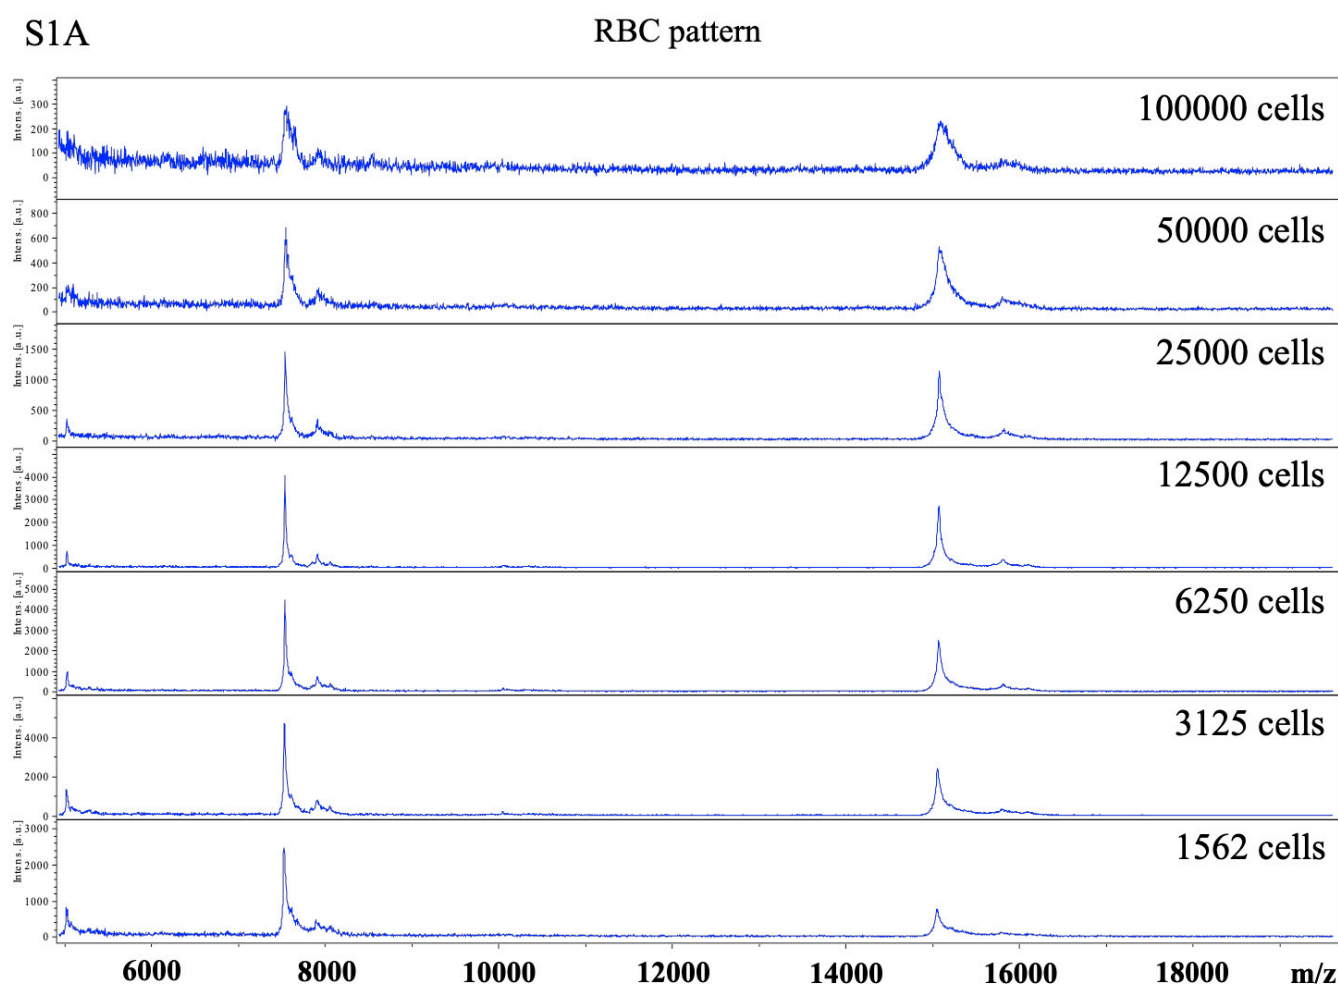

S1B

WBC pattern

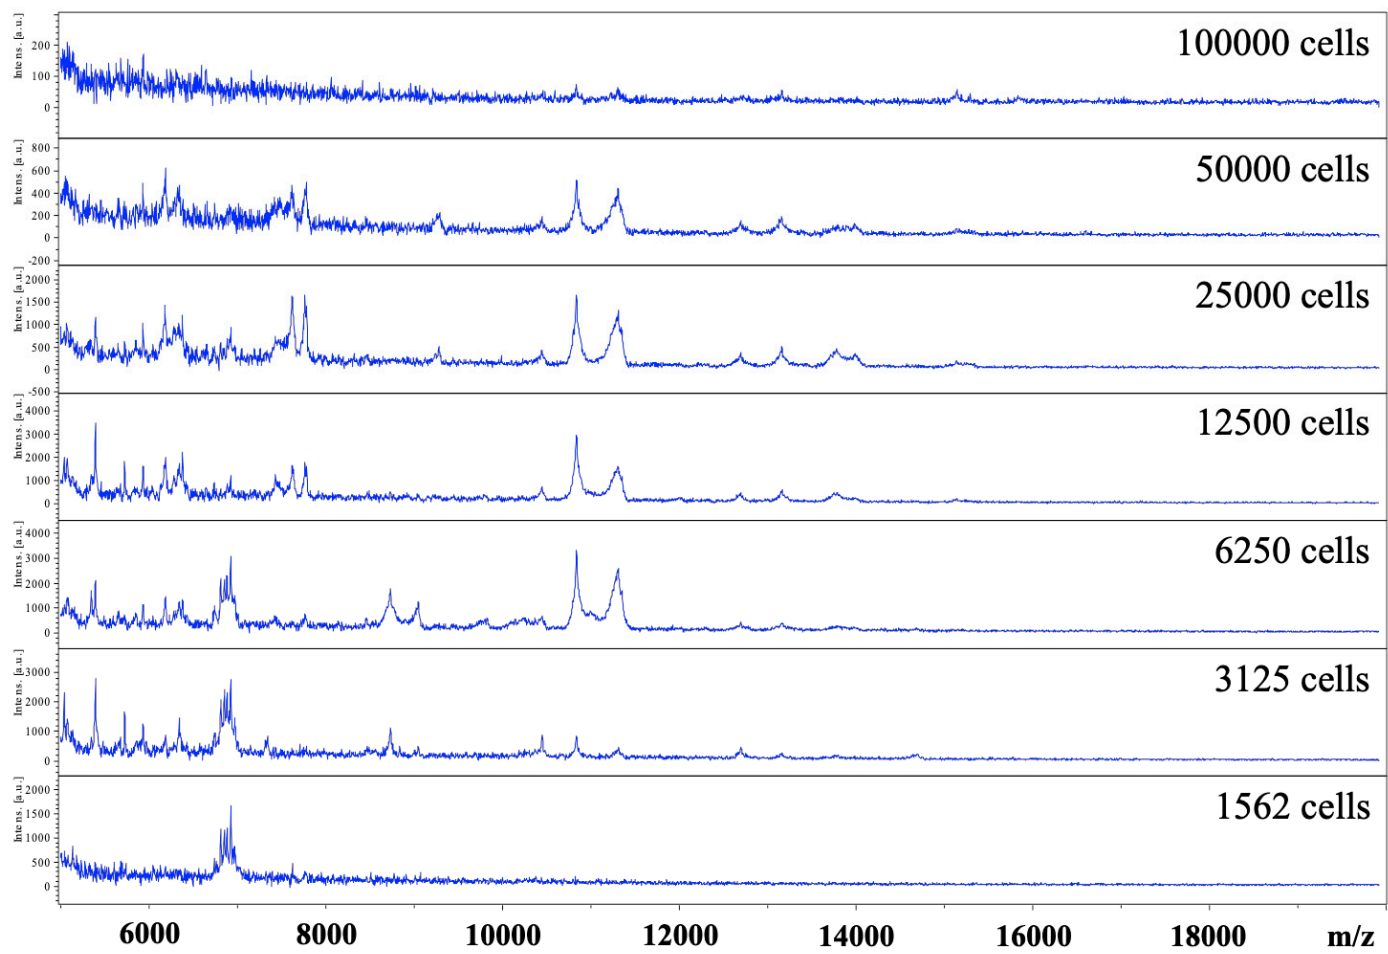

S1C

PBMC pattern

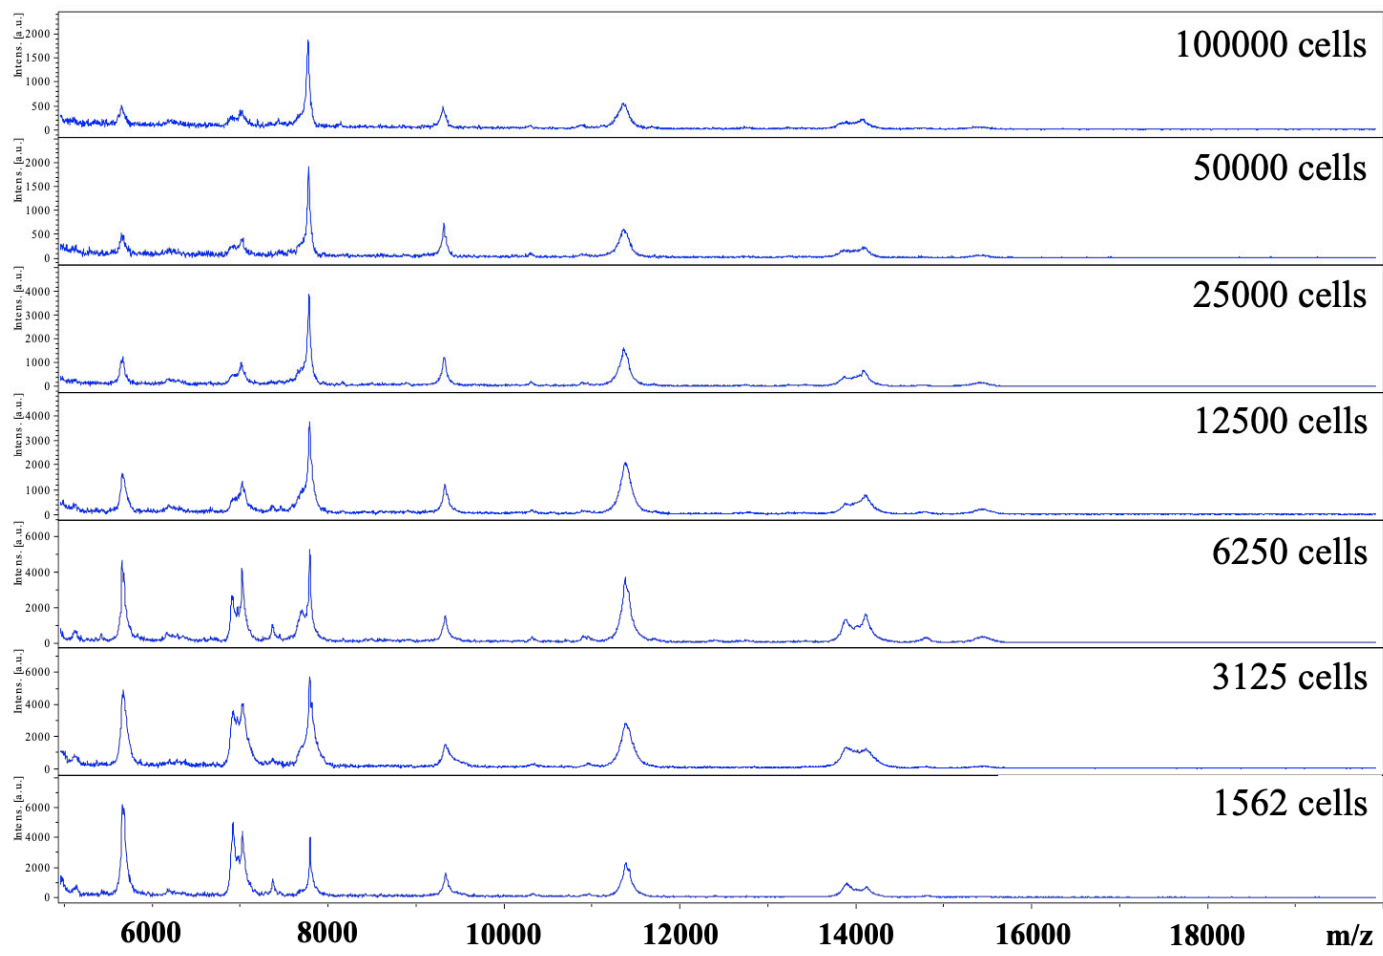

S1D

PHA activated T cell pattern

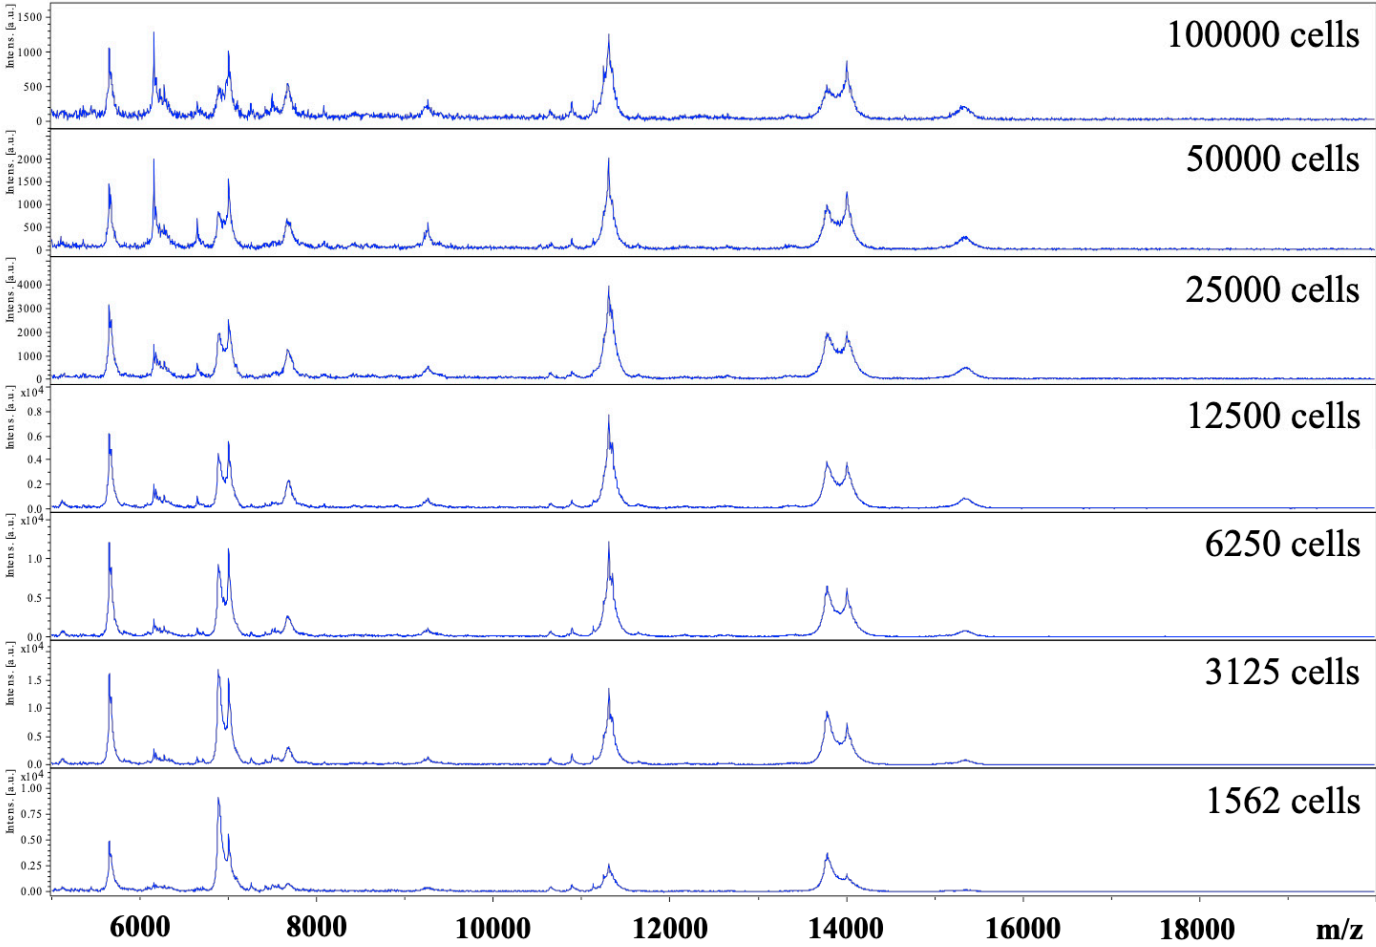

S1E

OKT3/CD28 T cell blast pattern

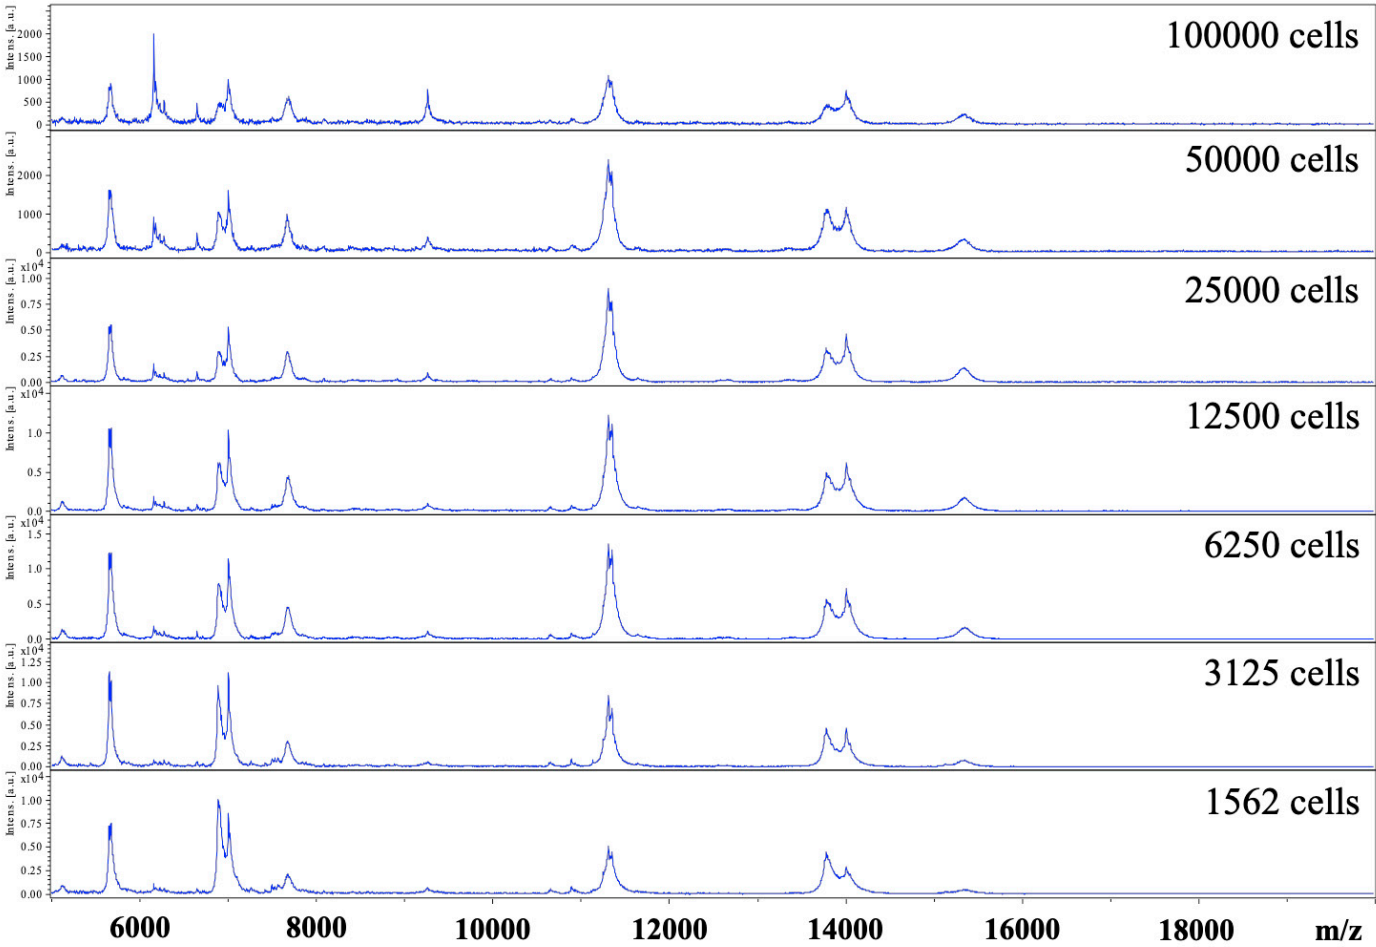

S1F

FHs74Int cell pattern

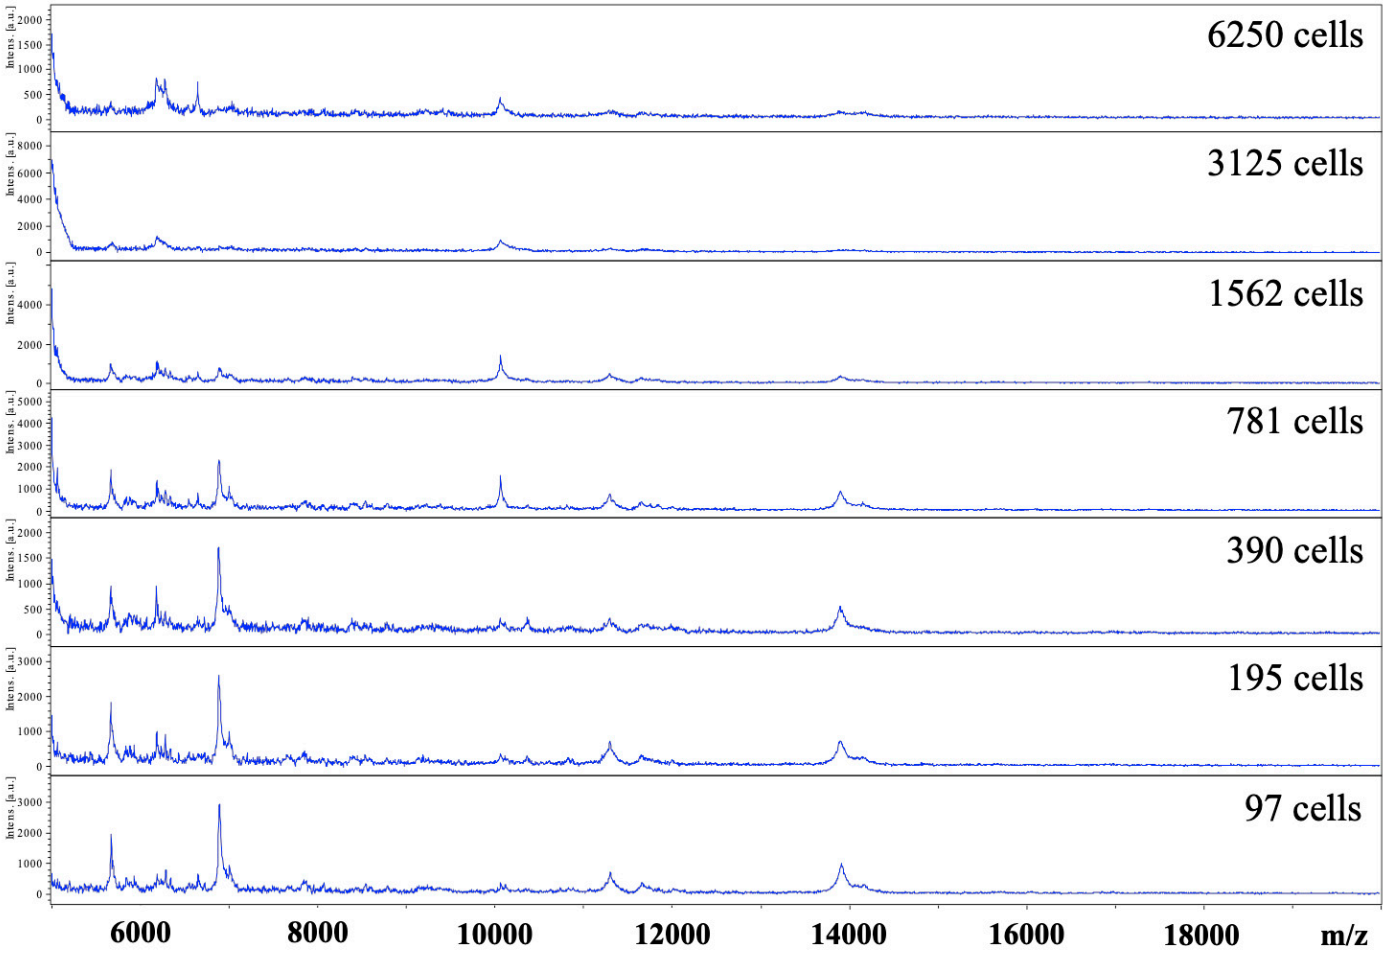

S1G

Plasma pattern

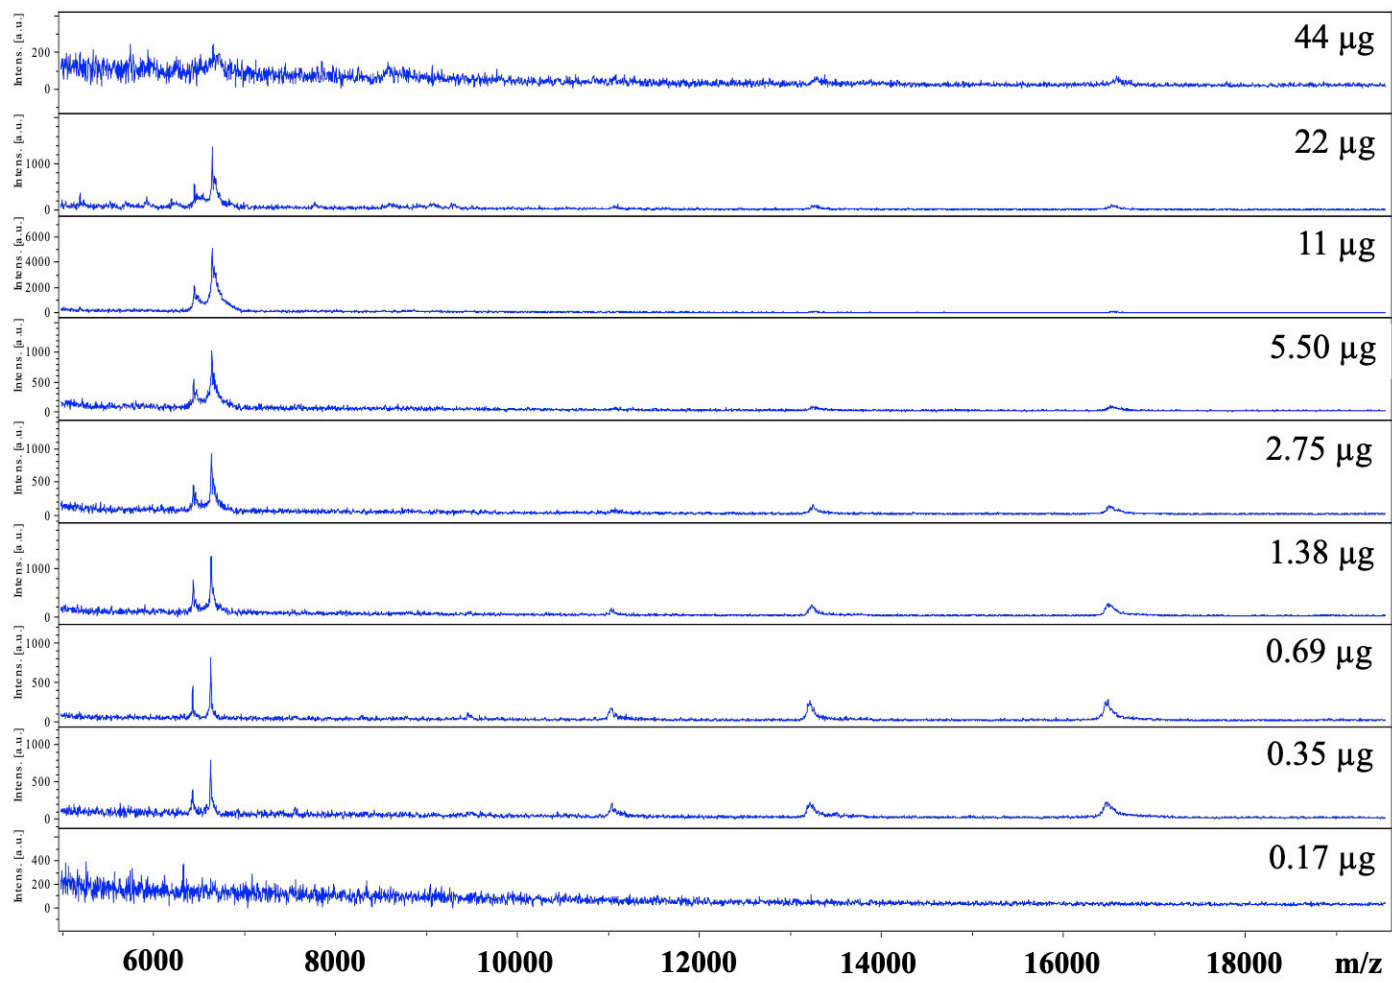

S1H

Jurkat cell pattern

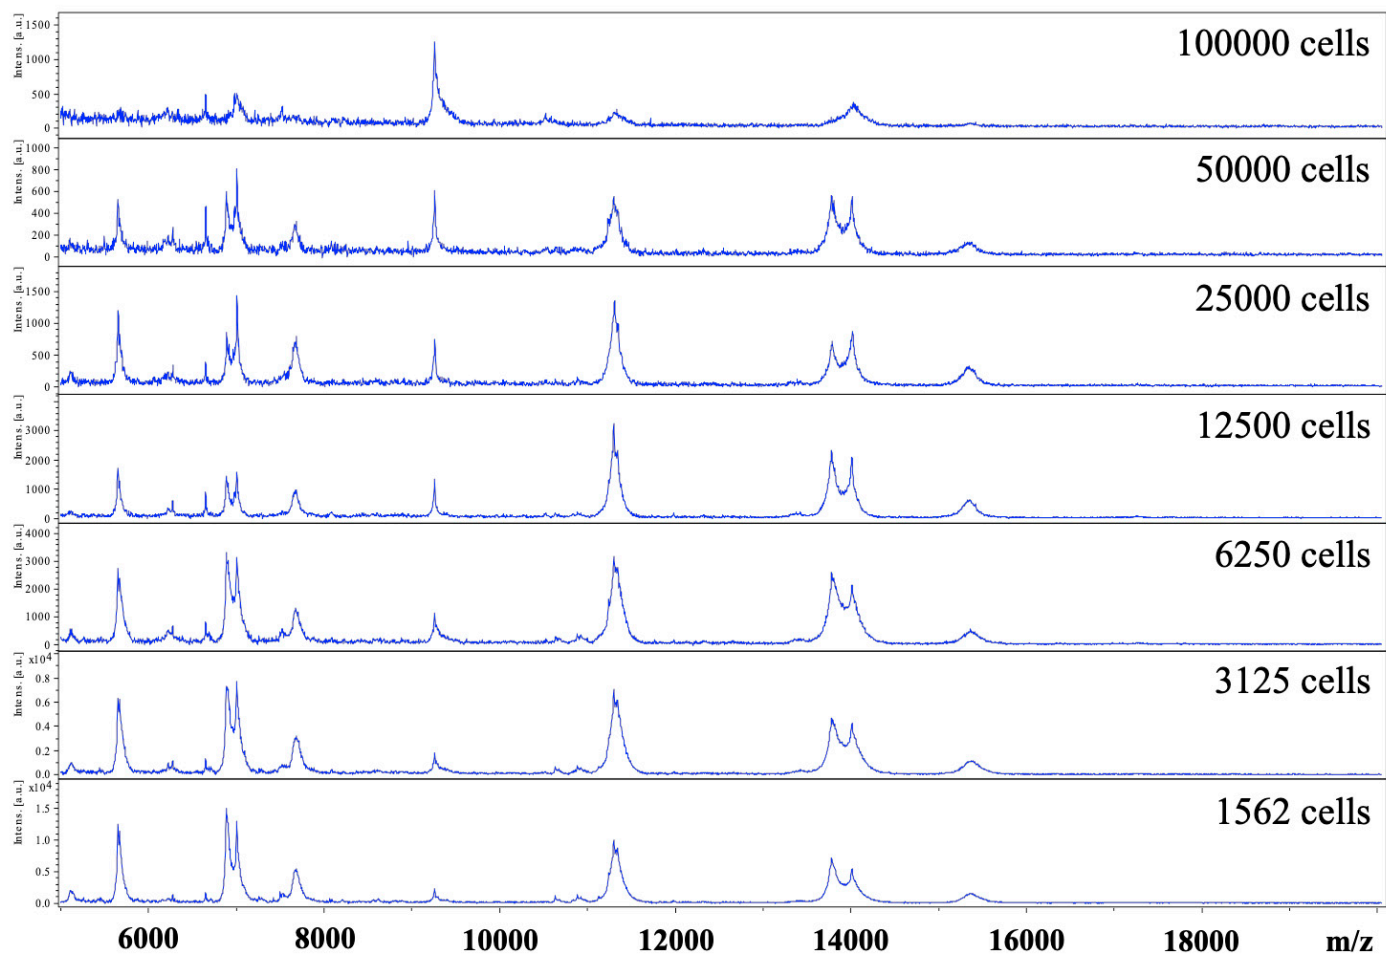

S1I

SK-N-SH cell pattern

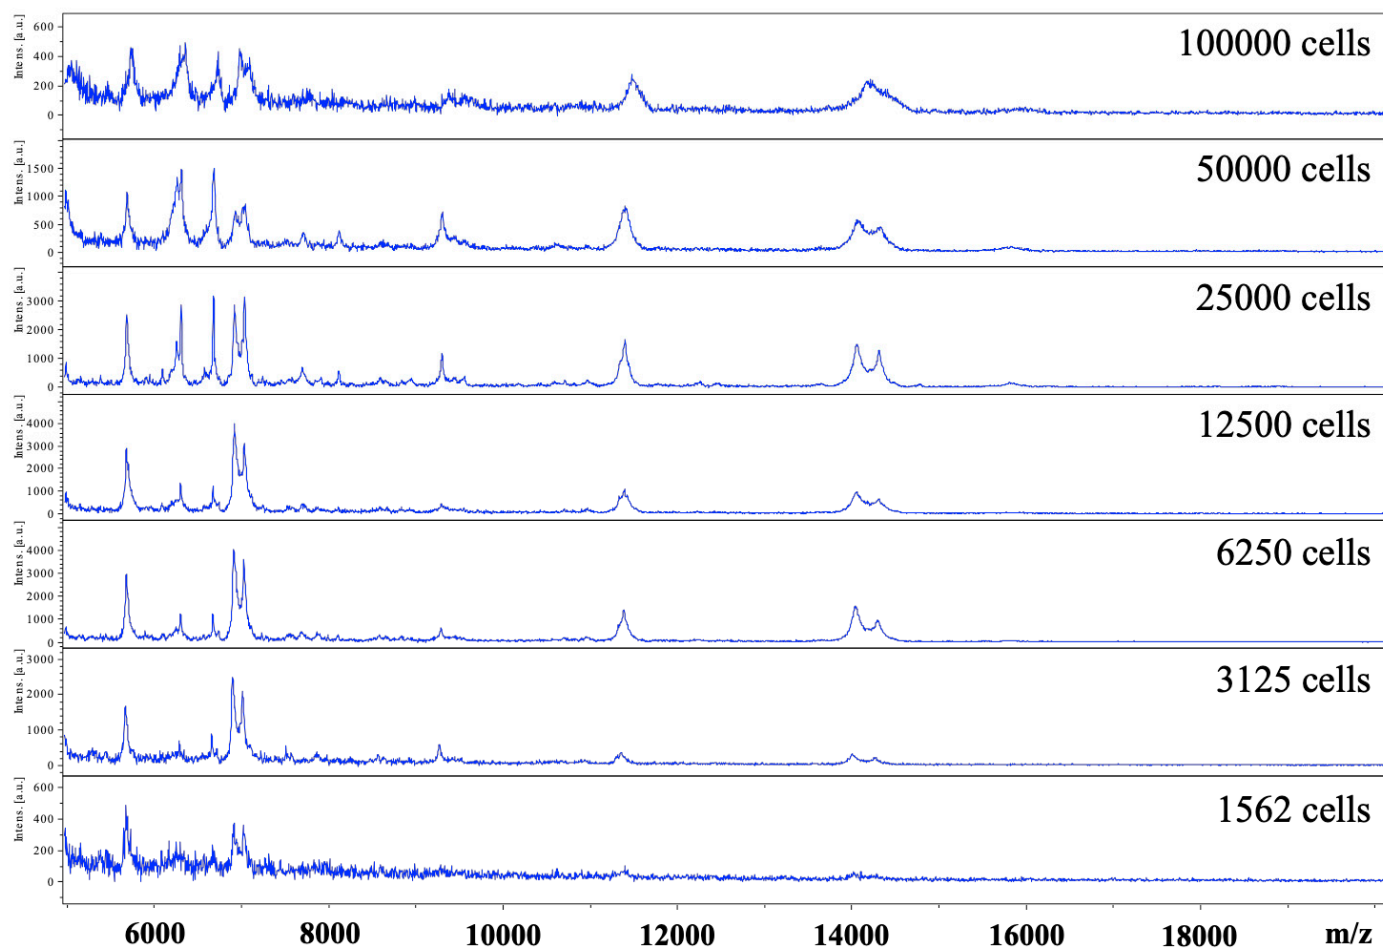

S1J

SH-SY5Y cell pattern

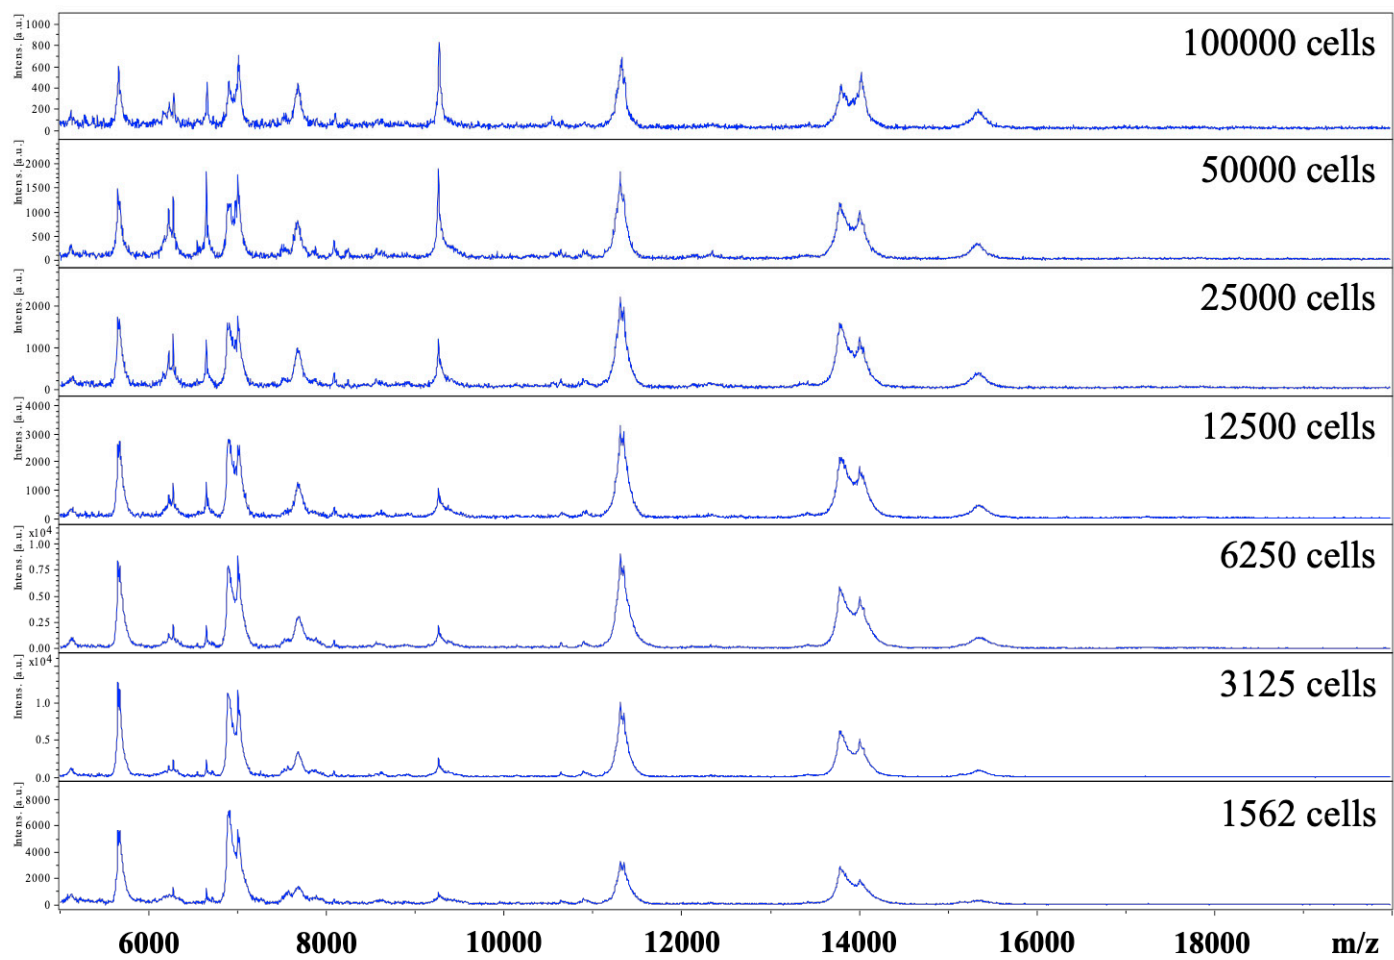

S1K

A549 cell pattern

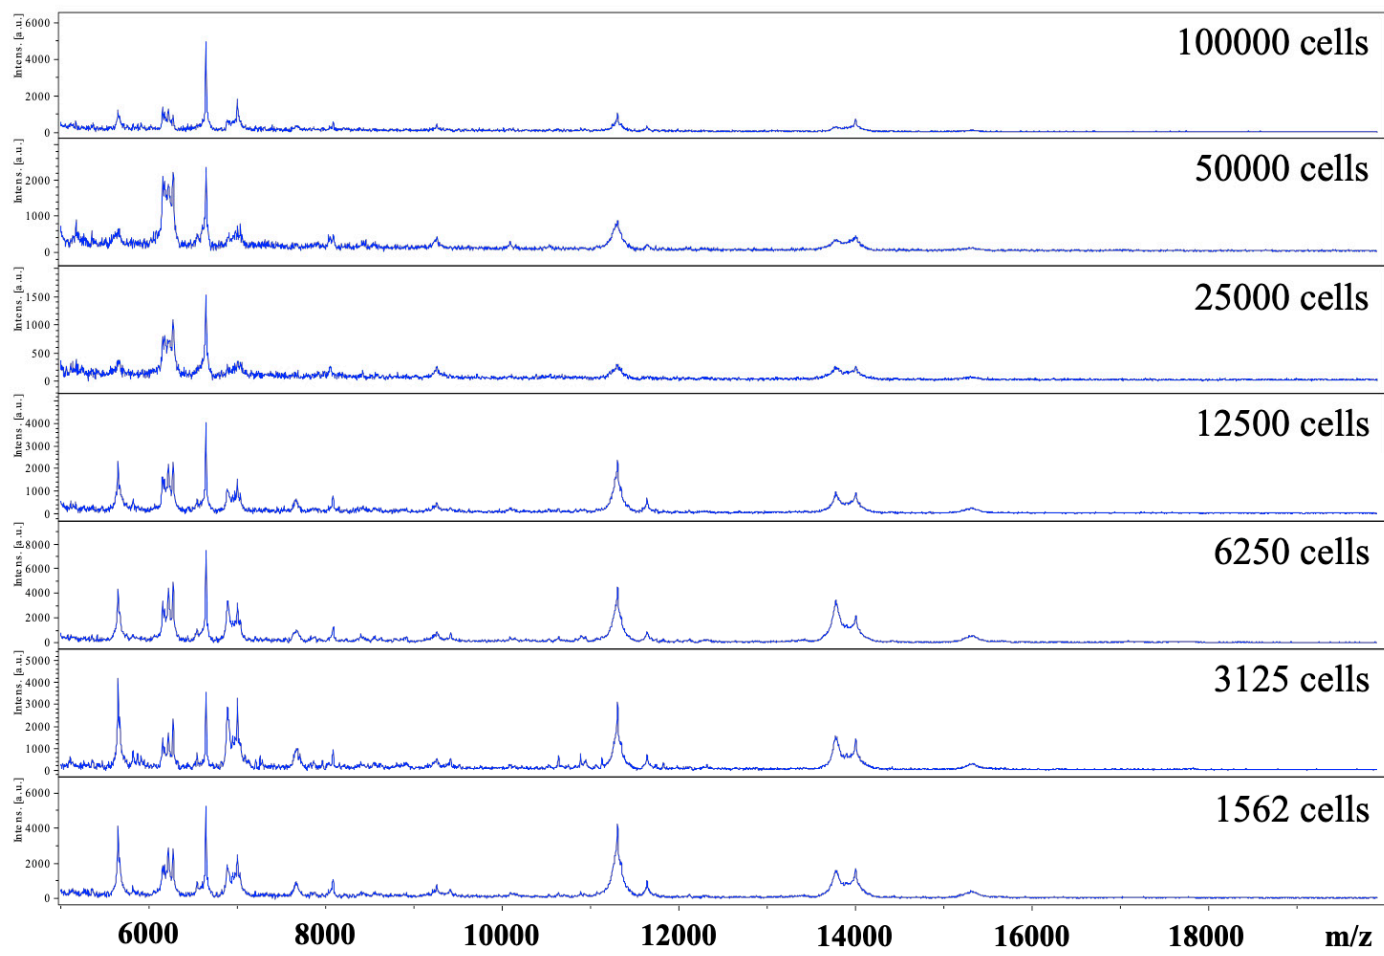

S1L

A2780 cell pattern

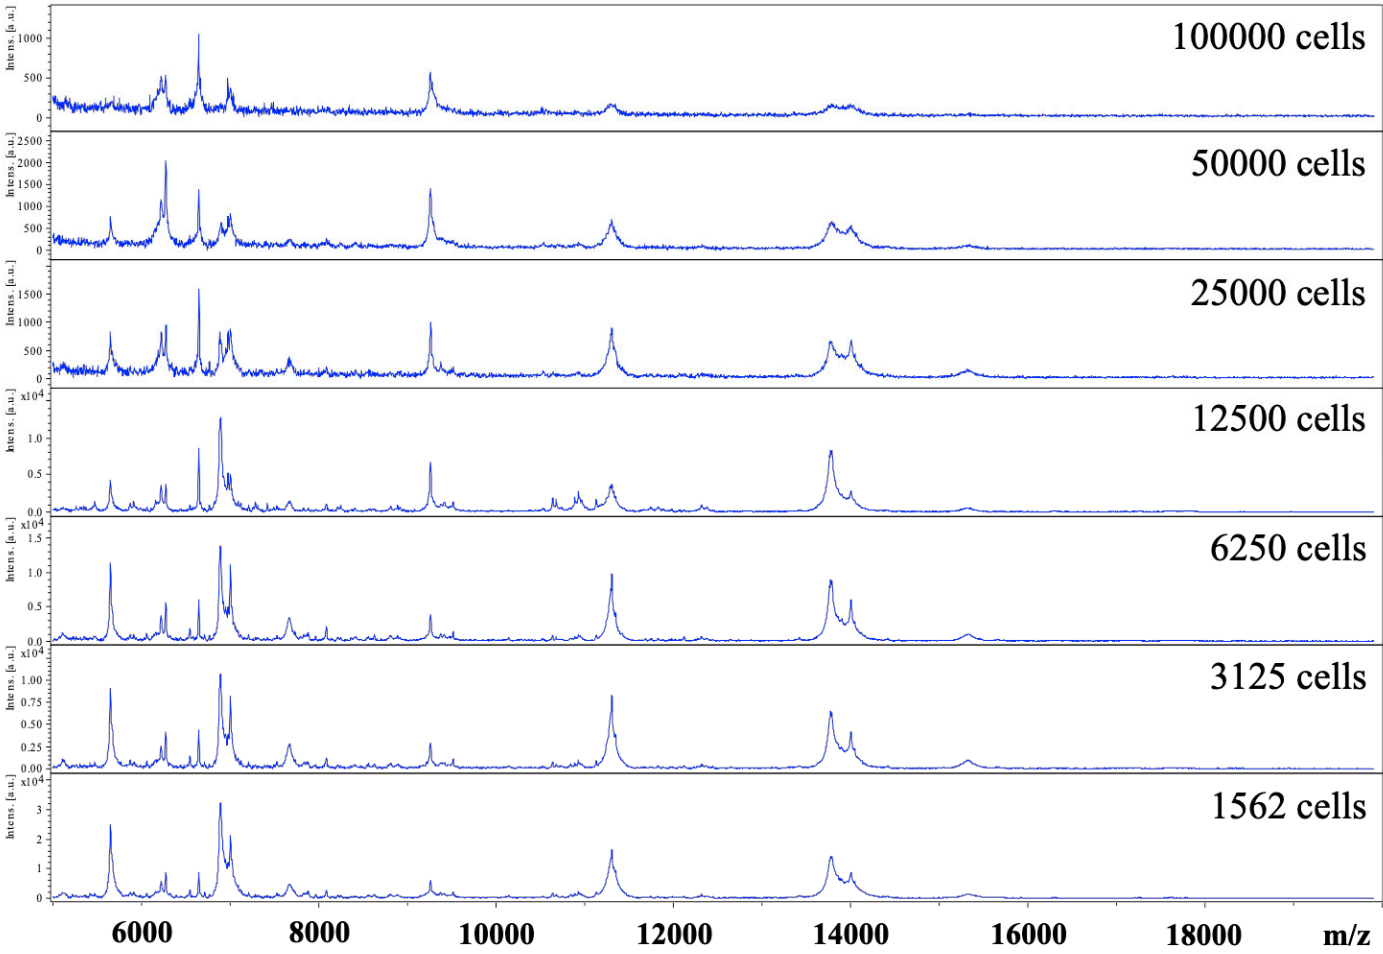

S1M

LNCaP cell pattern

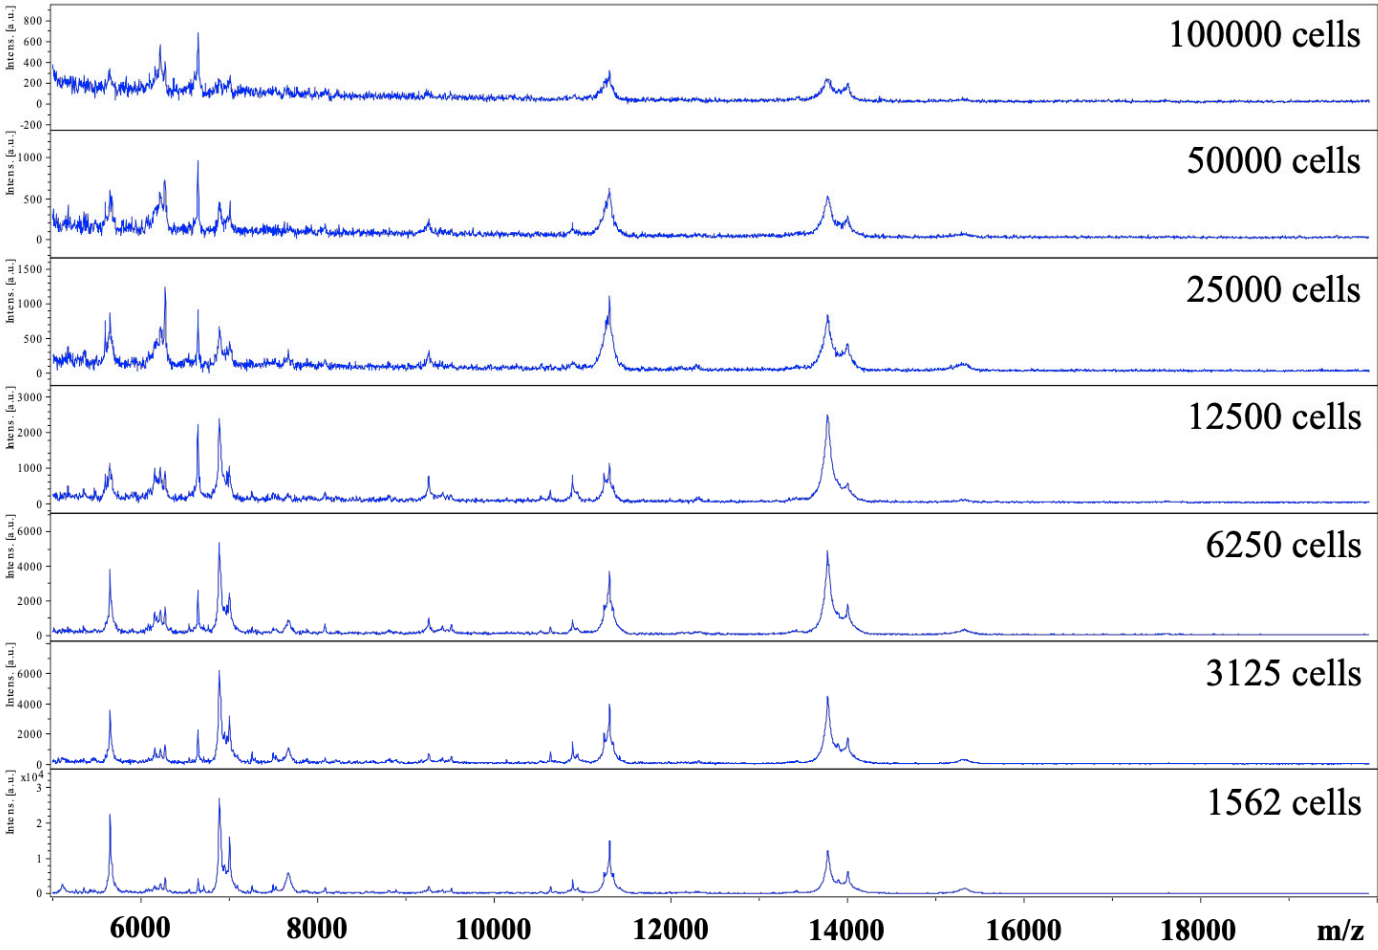

S1N

Caco-2 cell pattern

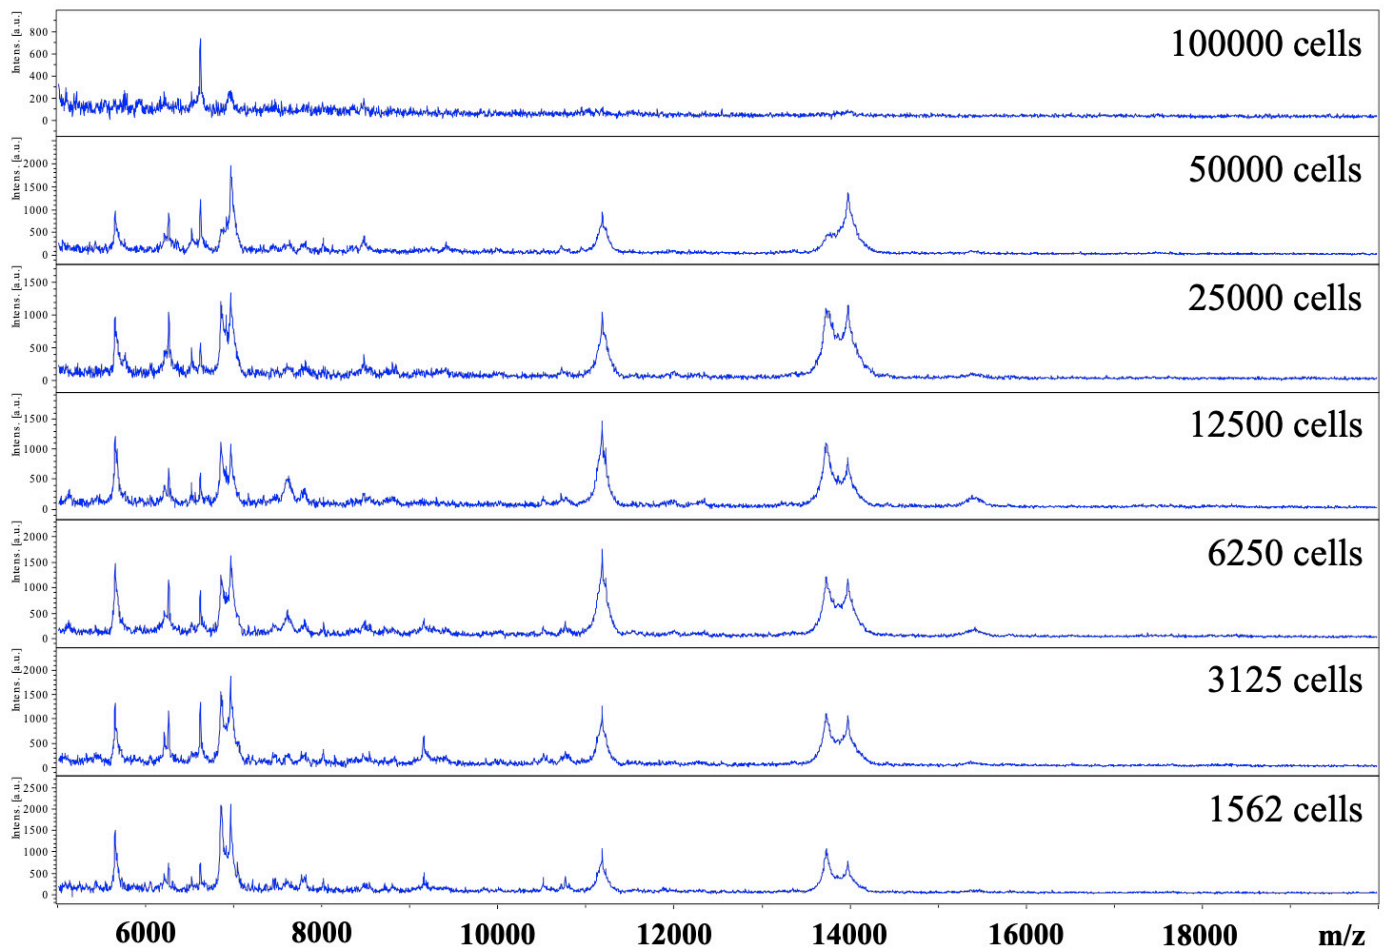

**Figure S1.** Whole-cell-MSP of normal and cancer cells at various cell dosages. (A) RBC; (B) WBC; (C) PBMC; (D) PHA activated T cell; (E) OKT/CD28 T cell blast; (F) FHs74Int; (G) plasma; (H) Jurkat; (I) SK-N-SH; (J) SH-SY5Y; (K) A549; (L) A2780; (M) LNCaP; (N) Caco-2.

**Table S1.** Culture medium for human cell lines in this study.

| Name     | Tissue           | Disease                   | Culture medium                                                                  |
|----------|------------------|---------------------------|---------------------------------------------------------------------------------|
| FHs74Int | Small intestine  | Normal                    | Hybri-Care Medium ATCC 46-X + 90% of 30 ng/mL EGF + 10%FBS                      |
| A2780    | Ovary            | Carcinoma                 | RPMI-1640+2 mM L-glutamine + 10% FBS + 1× Penicillin/Streptomycin               |
| A549     | Lung             | Carcinoma                 | DMEM/HAM'S F-12 + 2 mM·L-glutamine + 10% FBS + 1× Penicillin/Streptomycin       |
| Caco-2   | Colon            | Colorectal adenocarcinoma | DMEM + 2 mM L-glutamine + 10% FBS + 1× Penicillin/Streptomycin                  |
| Jurkat   | Peripheral blood | Acute T cell leukemia     | RPMI-1640 + 2 mM L-glutamine + 10% FBS + 1× Penicillin/Streptomycin             |
| LNCaP    | Prostate         | Carcinoma                 | RPMI-1640 + 2 mM L-glutamine + 10% FBS + 1× Penicillin/Streptomycin             |
| SK-N-SH  | Brain            | Neuroblastoma             | DMEM (1g/L glucose) + 2 mM L-glutamine + 10% FBS + 1× Penicillin/Streptomycin   |
| SH-SY5Y  | Bone marrow      | Neuroblastoma             | DMEM (4.5g/L glucose) + 2 mM L-glutamine + 10% FBS + 1× Penicillin/Streptomycin |

**Table S2.** The mass-to-charge (m/z), intensity, and frequency of main spectrum peaks of normal and cancer cell conditions. Blue, normal conditions. Red, cancer cell conditions.

| m/z     | Normal    |           | Cancer    |           |
|---------|-----------|-----------|-----------|-----------|
|         | Intensity | Frequency | Intensity | Frequency |
| 5043.18 | 15.46     | 71.7      |           |           |
| 5075.46 | 14.15     | 66.9      |           |           |
| 5093.74 | 11.08     | 54.6      |           |           |
| 5114.2  | 10.49     | 63.3      |           |           |
| 5145.94 | 9.33      | 49        | 10.6      | 60.8      |
| 5173.37 |           |           | 10.72     | 47.6      |
| 5183.48 | 19.18     | 71.3      |           |           |
| 5206.91 | 12.32     | 62.9      |           |           |
| 5225.35 | 11.45     | 48.6      | 10.11     | 55.4      |
| 5259.13 | 11.02     | 45.8      |           |           |
| 5313.19 | 10.63     | 52.2      |           |           |
| 5355.09 | 13.97     | 67.7      | 12.9      | 83.7      |
| 5376.39 | 11.86     | 66.9      |           |           |
| 5415.29 | 13.94     | 57.4      |           |           |
| 5421.98 |           |           | 13.31     | 69.9      |
| 5472.78 | 10.26     | 49.4      |           |           |
| 5585.21 | 9.91      | 45.4      |           |           |
| 5603.39 | 11.23     | 45.4      | 9.02      | 51.8      |
| 5618.3  | 13.43     | 60.2      |           |           |
| 5636.54 | 19.77     | 49        | 16.33     | 92.2      |
| 5653.22 | 57.01     | 83.7      | 65.01     | 92.8      |
| 5674.85 | 37.47     | 86.1      | 34.95     | 100       |
| 5691.52 | 26.22     | 70.5      | 17.11     | 89.2      |
| 5707.47 |           |           | 12.51     | 72.3      |
| 5720.72 | 18.07     | 69.3      | 10.27     | 60.2      |
| 5737.01 | 14.52     | 58.2      |           |           |
| 5755.91 | 11.04     | 49.4      |           |           |
| 5783.34 | 10.15     | 43.4      |           |           |
| 5810.49 | 12.79     | 50.6      |           |           |
| 5830.47 | 13.07     | 72.1      |           |           |
| 5921.75 | 13.01     | 69.3      |           |           |
| 5992.05 |           |           | 9.26      | 60.8      |
| 6061.32 | 11.22     | 47        | 8.95      | 51.8      |
| 6159.65 | 15.64     | 86.1      | 12.11     | 58.4      |
| 6177.59 | 27.36     | 67.3      | 20.15     | 67.5      |
| 6195.73 | 16.91     | 75.3      |           |           |
| 6226.3  | 24.86     | 76.9      | 17.08     | 90.4      |
| 6244.58 |           |           | 15.69     | 62        |
| 6261.99 |           |           | 22.16     | 57.2      |
| 6276.44 | 39.69     | 78.9      | 34.68     | 83.7      |
| 6293.13 |           |           | 12.33     | 74.7      |
| 6298.54 | 15.63     | 58.2      |           |           |
| 6330.95 | 12.58     | 53.4      | 20.87     | 66.9      |
| 6358.1  |           |           | 26.87     | 56        |
| 6364.12 | 11.38     | 54.6      |           |           |
| 6383.02 |           |           | 18.26     | 49.4      |
| 6512.09 | 11.56     | 46.2      | 14.75     | 48.2      |
| 6545.47 | 18.08     | 58.6      | 12.26     | 86.1      |
| 6567.28 | 12.2      | 49.4      |           |           |
| 6591.88 | 11.24     | 48.6      |           |           |
| 6628.67 | 23.19     | 45.4      |           |           |
| 6641.78 |           |           | 22.63     | 67.5      |
| 6647.14 | 38.25     | 77.3      | 57.72     | 51.8      |
| 6670.24 | 20.03     | 65.7      | 15.07     | 81.9      |

|          |       |      |       |      |
|----------|-------|------|-------|------|
| 6692.58  | 12.44 | 59.4 | 9.99  | 57.2 |
| 6713.84  |       |      | 8.7   | 75.3 |
| 6728.11  | 13.14 | 44.6 |       |      |
| 6889.69  | 30.06 | 80.1 | 51.51 | 95.2 |
| 6910.13  | 21.26 | 72.5 | 34.41 | 84.5 |
| 6926.03  | 24.62 | 50.6 | 21.12 | 71.1 |
| 6950.18  | 13.67 | 58.2 | 17.67 | 89.8 |
| 6976.7   | 13.53 | 45.8 |       |      |
| 6980.44  |       |      | 20.78 | 95.8 |
| 7007.11  | 25.35 | 72.9 | 62.86 | 98.2 |
| 7021.48  |       |      | 33.05 | 95.2 |
| 7036.64  | 19.17 | 69.7 | 21.16 | 77.7 |
| 7057.62  | 12.95 | 51.8 | 12.41 | 48.2 |
| 7080.54  | 11.49 | 45.8 |       |      |
| 7258.59  |       |      | 8.56  | 56.6 |
| 7527.42  |       |      | 7.09  | 51.8 |
| 7558.62  | 24.99 | 50.6 |       |      |
| 7624.56  |       |      | 8.18  | 47   |
| 7637.38  | 11.22 | 48.2 |       |      |
| 7647.25  |       |      | 10.72 | 63.3 |
| 7659.63  | 10.88 | 54.6 |       |      |
| 7668.73  |       |      | 15.43 | 48.8 |
| 7678.22  | 11.73 | 49.4 | 13.68 | 75.9 |
| 7703.24  | 10.42 | 48.6 |       |      |
| 7709.9   |       |      | 8.82  | 49.4 |
| 7835.01  | 10.24 | 55   |       |      |
| 7882.78  | 12.27 | 61   | 8.35  | 59   |
| 7930.28  | 10.68 | 45.8 |       |      |
| 8087.14  | 17.18 | 54.6 | 12.24 | 68.7 |
| 8558.19  |       |      | 17.45 | 69.3 |
| 8583.8   |       |      | 13.68 | 47.6 |
| 9263.08  |       |      | 28.25 | 57.8 |
| 10844.09 |       |      | 12.01 | 55.4 |
| 10877.55 |       |      | 7.37  | 54.2 |
| 11247.02 |       |      | 15.47 | 66.9 |
| 11268.14 | 19.6  | 55.4 | 19.31 | 87.3 |
| 11289.64 | 25.21 | 71.3 |       |      |
| 11307.18 | 44.01 | 61.4 | 42.46 | 93.4 |
| 11328.46 | 29    | 59.8 | 25.44 | 59.6 |
| 11348.59 | 27.72 | 66.1 | 27.14 | 78.9 |
| 11366.75 |       |      | 16.37 | 47.6 |
| 11371.86 | 22.84 | 53.4 |       |      |
| 11383.36 |       |      | 11.76 | 72.9 |
| 13744.32 |       |      | 18.58 | 61.4 |
| 13783.64 |       |      | 28.72 | 93.4 |
| 13788.19 |       |      | 28.63 | 66.9 |
| 13817.97 |       |      | 19.32 | 68.7 |
| 13852.6  |       |      | 13.67 | 53.6 |
| 13908.11 |       |      | 9.88  | 56   |
| 13988.19 |       |      | 23.46 | 80.7 |
| 14014.15 |       |      | 30.39 | 85.5 |
| 14053.31 |       |      | 16.18 | 74.1 |
